# Supplementary material for: Measuring Motivations to Eat Palatable Foods: Adaptation and Psychometric Properties of the Italian Version of the Palatable Eating Motives Scale (PEMS-IT)
Source: MDPI journal article supplement (doi:10.3390/healthcare12050574), 2024-02-29
Supplement: s1 [file s1]

## The Palatable Eating Motives Scale – Italian version (PEMS-IT)

### ISTRUZIONI:

Qui sotto è riportata una lista delle ragioni che talvolta spingono le persone a consumare cibi e bevande appetitosi, ad esempio:

- Dolci come cioccolata, ciambelle, biscotti, torte, caramelle, gelato, altri dessert
- Snack salati come patatine, salatini, cracker e noccioline
- Fast food o qualsiasi altro cibo fritto fatto in casa come hamburger, cheeseburger, pizza, pollo fritto e patatine fritte
- Bevande zuccherate come soda, tè dolce, milk-shake e bevande dolci al caffè.

Pensando a tutte le volte che hai consumato questi tipi di cibi o bevande, quanto spesso diresti che li hai mangiati o bevuti per ciascuna delle seguenti ragioni? Segna la risposta che meglio ti descrive **NON ESISTONO RISPOSTE GIUSTE O SBAGLIATE**

|    | 1                                                                                                              | 2             | 3                | 4                  | 5                     |
|----|----------------------------------------------------------------------------------------------------------------|---------------|------------------|--------------------|-----------------------|
|    | MAI / QUASI MAI                                                                                                | QUALCHE VOLTA | METÀ DELLE VOLTE | IL PIÙ DELLE VOLTE | QUASI SEMPRE / SEMPRE |
| 1  | Consumo questi cibi o bevande per dimenticare le mie preoccupazioni                                            |               |                  |                    |                       |
| 2  | Consumo questi cibi o bevande perché sono invogliato dai miei amici, o dai miei familiari, a mangiarle o berle |               |                  |                    |                       |
| 3  | Consumo questi cibi o bevande perché mi aiuta a godermi una festa                                              |               |                  |                    |                       |
| 4  | Consumo questi cibi o bevande perché mi aiuta quando mi sento depresso o nervoso                               |               |                  |                    |                       |
| 5  | Consumo questi cibi o bevande per essere socievole                                                             |               |                  |                    |                       |
| 6  | Consumo questi cibi o bevande per tirarmi su di morale quando sono di cattivo umore                            |               |                  |                    |                       |
| 7  | Consumo questi cibi o bevande perché mi piace la sensazione.                                                   |               |                  |                    |                       |
| 8  | Consumo questi cibi o bevande per evitare che gli altri mi prendano in giro perché non li mangio o bevo        |               |                  |                    |                       |
| 9  | Consumo questi cibi o bevande perché è stimolante.                                                             |               |                  |                    |                       |
| 10 | Consumo questi cibi o bevande per sentirmi su di giri o provare euforia                                        |               |                  |                    |                       |
| 11 | Consumo questi cibi o bevande perché rende più divertenti le occasioni di ritrovo sociale                      |               |                  |                    |                       |
| 12 | Consumo questi cibi o bevande per sentirmi parte di un gruppo di persone che mi piace                          |               |                  |                    |                       |
| 13 | Consumo questi cibi o bevande perché mi danno una sensazione piacevole                                         |               |                  |                    |                       |
| 14 | Consumo questi cibi o bevande perché mi fanno vivere meglio feste e ricorrenze                                 |               |                  |                    |                       |
| 15 | Consumo questi cibi o bevande perché mi aiutano a ridurre lo stress                                            |               |                  |                    |                       |
| 16 | Consumo questi cibi o bevande per celebrare un'occasione speciale con amici o familiari                        |               |                  |                    |                       |
| 17 | Consumo questi cibi o bevande per dimenticare i miei problemi                                                  |               |                  |                    |                       |
| 18 | Consumo questi cibi o bevande per il piacere di farlo                                                          |               |                  |                    |                       |
| 19 | Consumo questi cibi o bevande per piacere agli altri                                                           |               |                  |                    |                       |
| 20 | Consumo questi cibi o bevande così da non sentirmi tagliato fuori                                              |               |                  |                    |                       |
